# Supplementary material for: Ditopic hexaazamacrocycles containing pyridine: synthesis, protonation and complexation studies
Source: Royal Society of Chemistry journal article supplement (doi:10.1039/b415718d), 2004-11-24
Supplement: b415718d.doc [file b415718d.doc]

**Supplementary Material**

1) **Description of the structure 2b**

The molecular structure of [Ni([20]py2N4)]2+ (**2b**) is presented in Fig. S1. The significant distances and angles associated with the co-ordination sphere are given in Table S1. The nickel centre is wrapped by the macrocycle in pseudo-octahedral environment. The [20]py2N4 ligand adopts a helical topology with a twist angle between the two pyridine rings of rings of 62.8(5)º. This geometric arrangement was found for the cation in the complex [Ni([20]py2N4)](ClO4)2 **3** (ref. 4) as well as in the related mononuclear complexes [M([20]py2N4)]n+ (n = 3 for M = Co3+ or n = 2 for M = Cu2+).4 As described below, the crystals of aggregate **2** were obtained from one pot synthesis of CuSO4 and Ni(ClO4)2 with [20]py2N4 and consequently either of the complex cations, [M2([20]py2N4)(CH3CN)4]4+ or [M([20]py2N4)]2+, can incorporate copper or nickel ions. However, the comparison of the M-N distances of [Ni([20]py2N4)]2+ cation in complexes **2b** and **3** with those found for the [Cu([20]py2N4)]2+ **4** (ref. 4) gives a clear indication that the mononuclear complex contains Ni(II) rather than Cu(II), which is only present in the dinuclear complex. Furthermore the Ni2+ centre has an electronic preference to form six-co-ordinate octahedral rather than penta-coordinated complexes. In compound **2b**,the complex cation shows *C*2 crystallographic symmetry with the 2-fold axis running thorough the metal centre and two nitrogen pyridine donors, giving an angle Nsp2-Ni-Nsp2 of 180º and four independent Ni-N distances: two Ni-Nsp2 of 2.004(12) and 2.005(12) Å and two Ni-Nsp3 of 2.173(10) and 2.189(11) Å. The [Ni([20]py2N4)]2+ cation in complex **3** displays a hexa-coordination with six Ni-N independent distances [Ni-Nsp2 1.991(7) and 2.006(6) Å; Ni-Nsp3 2.164(7), 2.189(5), 2.195(6) and 2.229(6) Å], which are similar to those reported in complex **2**. The octahedral [Cu([20]py2N4)]2+ cation **4** (ref. 4) has two mutually *trans* Cu-Nsp3 bonds with distances, 2.411(5) and 2.341(5) Å, markedly longer than the remaining ones: Cu-Nsp3 2.129(5) and 2.170(5) Å and Cu-Nsp2 1.949(5) and 2.017(5) Å). This tetragonal distortion is due to the Jahn-Teller effect which is expected for complexes having metal centres with *d*9 electron configurations, and therefore this electronic effect is absent in the [Ni([20]py2N4)]2+ cation in complexes **2b** and **3**. The distances between the nitrogen macrocyclic donor atoms found for **1a**, **2a** and **2b** follow the usual pattern reported for metal complexes incorporating a pyridine moiety, *i.e* the two M-Nsp2 bonds are shorter than the remaining four M-Nsp3 bonds.4,6

**(insert Fig_S1)**

**Fig. S1** Molecular structure of the mononuclear complex [Ni([20]py2N4)]2+ in the aggregate **2**.

| **Table S1.** Selected bond lengths (Å) and angles (º) for [Ni([20]py2N4)]2+ (**2b**) in complex **2** | | | |
| --- | --- | --- | --- |
| Ni(1)-N(11) | 2.004(12) | Ni(1)-N(25) | 2.005(12) |
| Ni(1)-N(16) | 2.173(10) | Ni(1)-N(20) | 2.189(11) |
|  |  |  |  |
| N(25)-Ni(1)-N(11) | 180.0 | N(25)-Ni(1)-N(16) | 101.1(3) |
| N(11)-Ni(1)-N(16) | 78.9(3) | N(16)-Ni(1)-N(16*d*) | 157.9(6) |
| N(25)-Ni(1)-N(20) | 78.8(3) | N(11)-Ni(1)-N(20) | 101.2(3) |
| N(16)-Ni(1)-N(20*d*) | 91.4(4) | N(16)-Ni(1)-N(20) | 92.9(4) |
| N(20*d*) -Ni(1)-N(20) | 157.6(6) |  |  |

*d* denotes the symmetry operations *x*,-*y*+1,-*z* respectively.
