# Supplementary figures and images for: Ditopic hexaazamacrocycles containing pyridine: synthesis, protonation and complexation studies
Source: Royal Society of Chemistry journal article supplement (doi:10.1039/b415718d), 2004-11-24

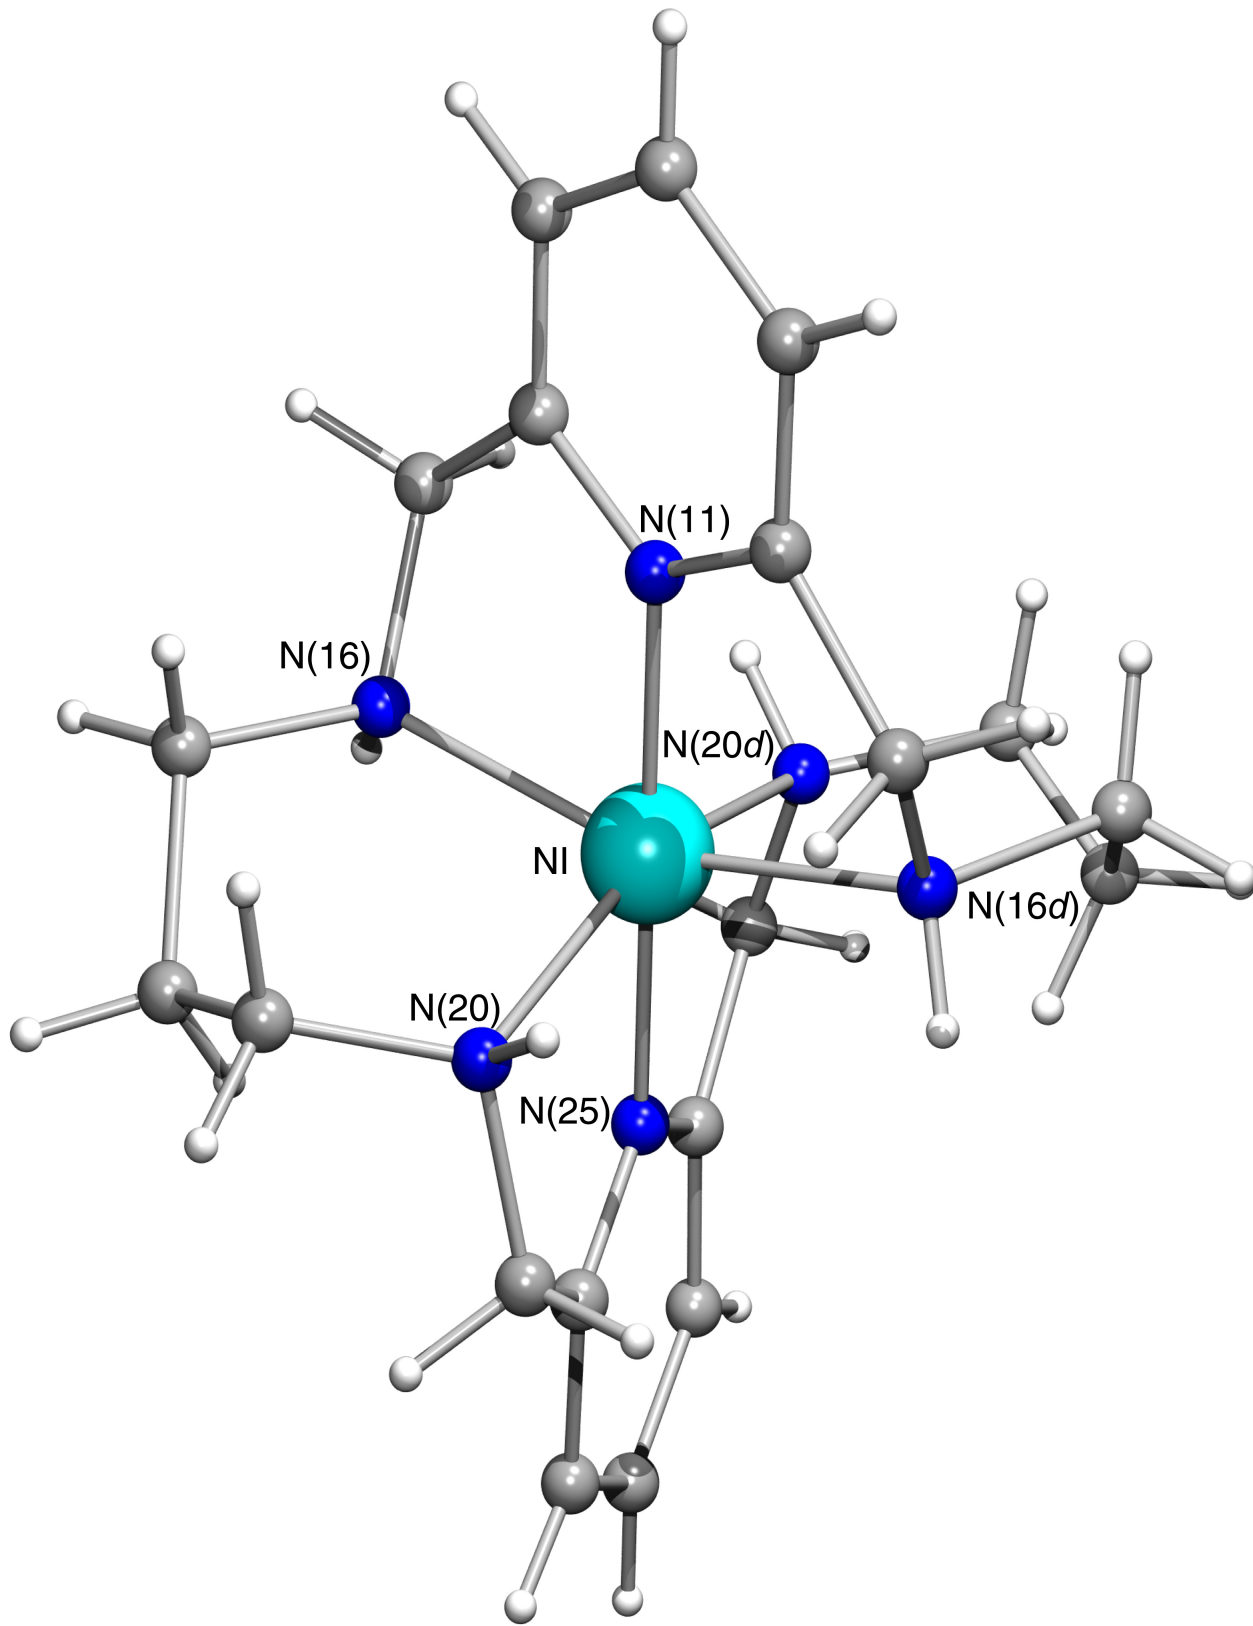

Supplement: b415718d.pdf [file b415718d.pdf]
